# Supplementary material for: Influence of oxytocin receptor single nucleotide sequence variants on contractility of human myometrium: an in vitro functional study
Source: Springer Nature journal article supplement (doi:10.1186/s12881-019-0894-8), 2019-11-12

LD (D') Matrix results in EUR (including CEU, TSI, FIN, GBR and IBS populations) calculated with Ldlink (<https://ldlink.nci.nih.gov/>)

| RS_number  | rs1042778 | rs11706648 | rs237888 | rs4686301 | rs53576 | rs237895 | rs237902 | rs4686302 |
|------------|-----------|------------|----------|-----------|---------|----------|----------|-----------|
| rs1042778  | 1         | 0.377      | 0.912    | 0.343     | 0.489   | 0.306    | 0.234    | 0.197     |
| rs11706648 | 0.377     | 1          | 1        | 0.967     | 0.513   | 0.236    | 0.1      | 0.308     |
| rs237888   | 0.912     | 1          | 1        | 1         | 0.281   | 0.208    | 0.108    | 0.577     |
| rs4686301  | 0.343     | 0.967      | 1        | 1         | 0.531   | 0.254    | 0.137    | 0.296     |
| rs53576    | 0.489     | 0.513      | 0.281    | 0.531     | 1       | 0.962    | 0.939    | 0.928     |
| rs237895   | 0.306     | 0.236      | 0.208    | 0.254     | 0.962   | 1        | 0.978    | 1         |
| rs237902   | 0.234     | 0.1        | 0.108    | 0.137     | 0.939   | 0.978    | 1        | 1         |
| rs4686302  | 0.197     | 0.308      | 0.577    | 0.296     | 0.928   | 1        | 1        | 1         |

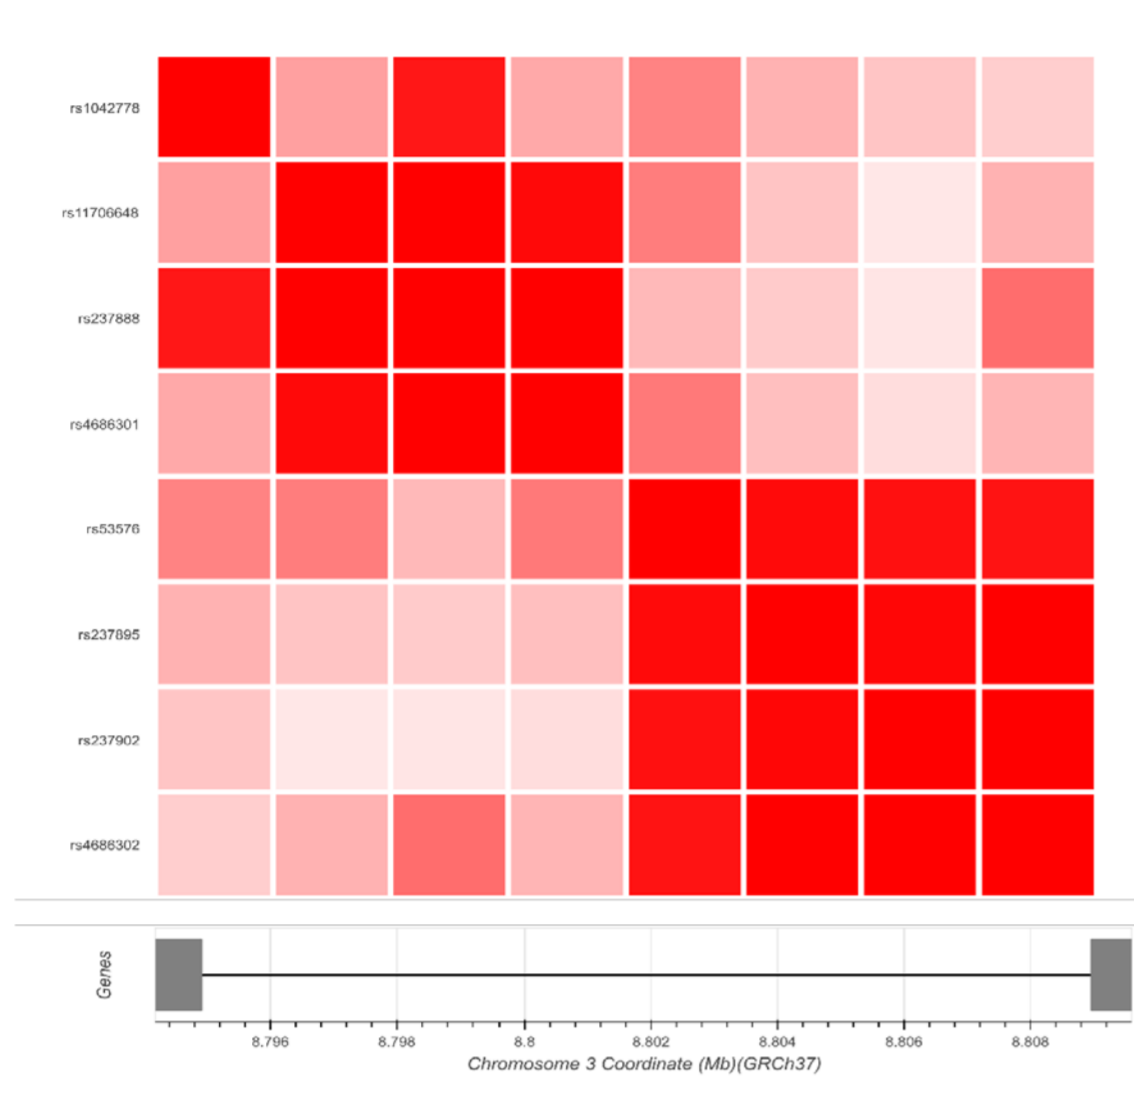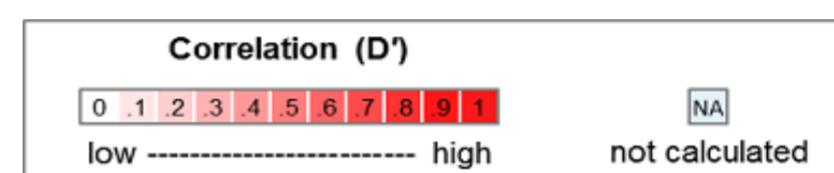

LD (R<sup>2</sup>) Matrix results in EUR (including CEU, TSI, FIN, GBR and IBS populations) calculated with Ldlink (<https://ldlink.nci.nih.gov/>)

| RS_number  | rs1042778 | rs11706648 | rs237888 | rs4686301 | rs53576 | rs237895 | rs237902 | rs4686302 |
|------------|-----------|------------|----------|-----------|---------|----------|----------|-----------|
| rs1042778  | 1         | 0.111      | 0.032    | 0.087     | 0.078   | 0.039    | 0.044    | 0.003     |
| rs11706648 | 0.111     | 1          | 0.03     | 0.884     | 0.067   | 0.018    | 0.01     | 0.027     |
| rs237888   | 0.032     | 0.03       | 1        | 0.028     | 0.009   | 0.004    | 0.002    | 0.003     |
| rs4686301  | 0.087     | 0.884      | 0.028    | 1         | 0.068   | 0.02     | 0.017    | 0.026     |
| rs53576    | 0.078     | 0.067      | 0.009    | 0.068     | 1       | 0.718    | 0.232    | 0.062     |
| rs237895   | 0.039     | 0.018      | 0.004    | 0.02      | 0.718   | 1        | 0.324    | 0.093     |
| rs237902   | 0.044     | 0.01       | 0.002    | 0.017     | 0.232   | 0.324    | 1        | 0.065     |
| rs4686302  | 0.003     | 0.027      | 0.003    | 0.026     | 0.062   | 0.093    | 0.065    | 1         |

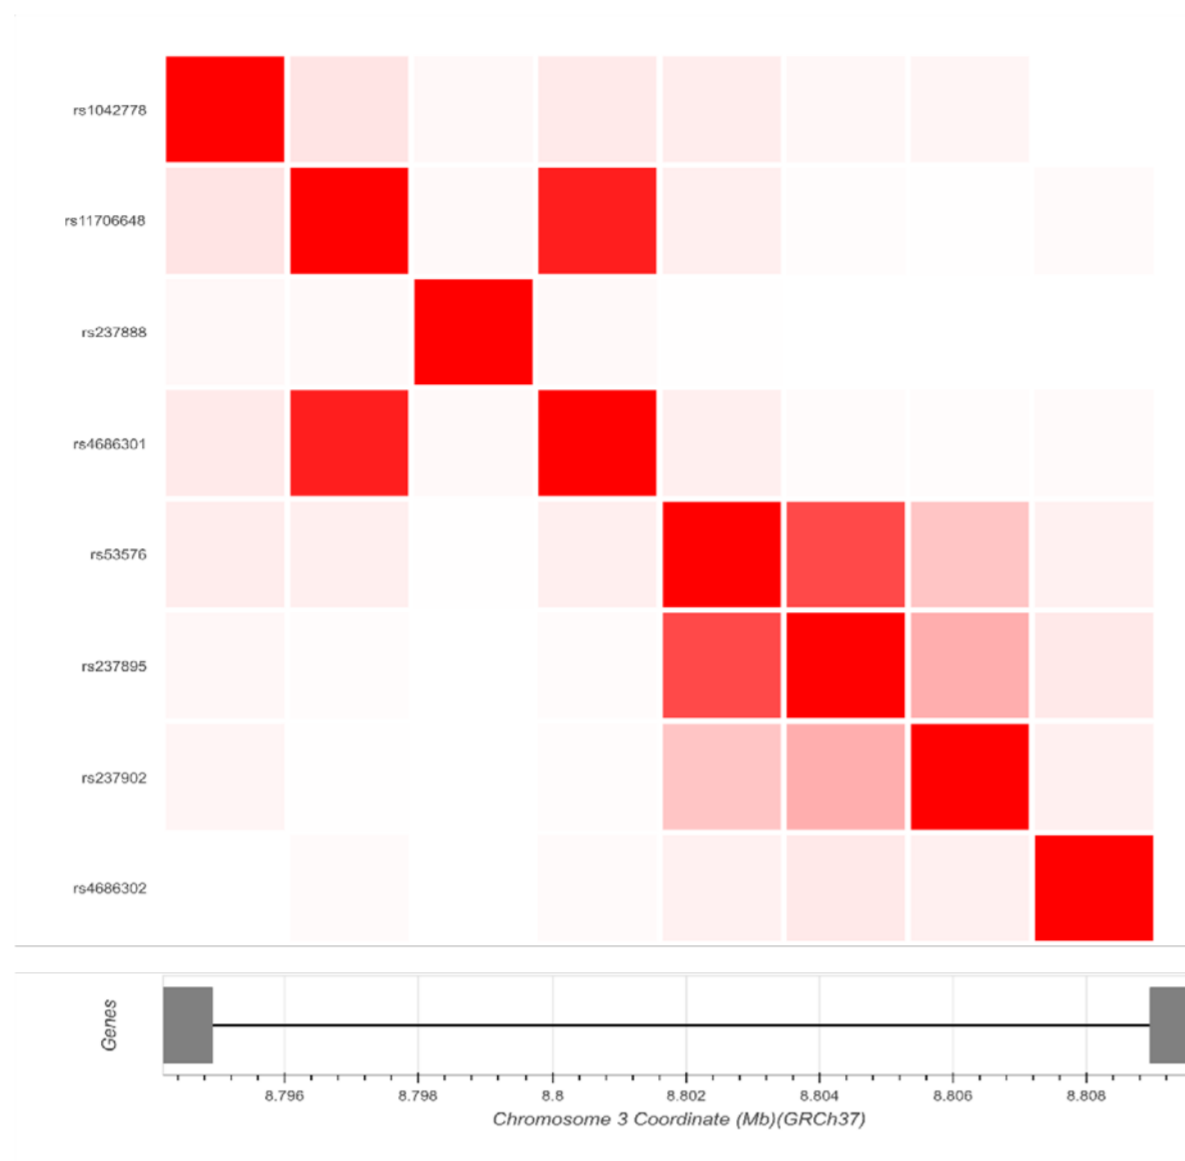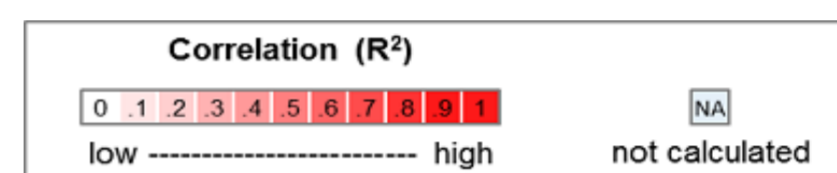

Supplement: MOESM2 [file 17378822]
