# Supplementary material for: Influence of oxytocin receptor single nucleotide sequence variants on contractility of human myometrium: an in vitro functional study
Source: Springer Nature journal article supplement (doi:10.1186/s12881-019-0894-8), 2019-11-12
Supplement: MOESM1 [file 17378822]

| ID                   | SNP                        | Chromosome | Position | REF Allele | ALT Allele | Contig     | Contig Position | Band  | dbSNP                      |
|----------------------|----------------------------|------------|----------|------------|------------|------------|-----------------|-------|----------------------------|
| chr3:8752859:G/C/T:1 | <a href="#">rs1042778</a>  | chr3       | 8752859  | G          | Y          | GL000033.2 | 8742859         | p25.3 | <a href="#">rs1042778</a>  |
| chr3:8754861:A/C:1   | <a href="#">rs11706648</a> | chr3       | 8754861  | A          | C          | GL000033.2 | 8744861         | p25.3 | <a href="#">rs11706648</a> |
| chr3:8755409:T/C:1   | <a href="#">rs237888</a>   | chr3       | 8755409  | T          | C          | GL000033.2 | 8745409         | p25.3 | <a href="#">rs237888</a>   |
| chr3:8756900:C/T:1   | <a href="#">rs4686301</a>  | chr3       | 8756900  | C          | T          | GL000033.2 | 8746900         | p25.3 | <a href="#">rs4686301</a>  |
| chr3:8762685:A/G:1   | <a href="#">rs53576</a>    | chr3       | 8762685  | A          | G          | GL000033.2 | 8752685         | p25.3 | <a href="#">rs53576</a>    |
| chr3:8765737:T/C:1   | <a href="#">rs237895</a>   | chr3       | 8765737  | T          | C          | GL000033.2 | 8755737         | p25.3 | <a href="#">rs237895</a>   |
| chr3:8767498:G/A:1   | <a href="#">rs237902</a>   | chr3       | 8767498  | G          | A          | GL000033.2 | 8757498         | p25.3 | <a href="#">rs237902</a>   |
| chr3:8767536:C/T:1   | <a href="#">rs4686302</a>  | chr3       | 8767536  | C          | T          | GL000033.2 | 8757536         | p25.3 | <a href="#">rs4686302</a>  |

| ID                   | SNP                        | Chromosome | Position | Overlapped Gene      | Type           | Annotation                |
|----------------------|----------------------------|------------|----------|----------------------|----------------|---------------------------|
| chr3:8752859:G/C/T:1 | <a href="#">rs1042778</a>  | chr3       | 8752859  | <a href="#">CAV3</a> | protein_coding | non-coding intronic       |
| chr3:8752859:G/C/T:1 | <a href="#">rs1042778</a>  | chr3       | 8752859  | <a href="#">OXTR</a> | protein_coding | 3utr                      |
| chr3:8754861:A/C:1   | <a href="#">rs11706648</a> | chr3       | 8754861  | <a href="#">CAV3</a> | protein_coding | non-coding intronic       |
| chr3:8754861:A/C:1   | <a href="#">rs11706648</a> | chr3       | 8754861  | <a href="#">OXTR</a> | protein_coding | intronic                  |
| chr3:8755409:T/C:1   | <a href="#">rs237888</a>   | chr3       | 8755409  | <a href="#">CAV3</a> | protein_coding | non-coding intronic       |
| chr3:8755409:T/C:1   | <a href="#">rs237888</a>   | chr3       | 8755409  | <a href="#">OXTR</a> | protein_coding | intronic                  |
| chr3:8756900:C/T:1   | <a href="#">rs4686301</a>  | chr3       | 8756900  | <a href="#">CAV3</a> | protein_coding | non-coding intronic       |
| chr3:8756900:C/T:1   | <a href="#">rs4686301</a>  | chr3       | 8756900  | <a href="#">OXTR</a> | protein_coding | intronic                  |
| chr3:8762685:A/G:1   | <a href="#">rs53576</a>    | chr3       | 8762685  | <a href="#">CAV3</a> | protein_coding | non-coding intronic       |
| chr3:8762685:A/G:1   | <a href="#">rs53576</a>    | chr3       | 8762685  | <a href="#">OXTR</a> | protein_coding | intronic                  |
| chr3:8765737:T/C:1   | <a href="#">rs237895</a>   | chr3       | 8765737  | <a href="#">CAV3</a> | protein_coding | non-coding intronic       |
| chr3:8765737:T/C:1   | <a href="#">rs237895</a>   | chr3       | 8765737  | <a href="#">OXTR</a> | protein_coding | intronic                  |
| chr3:8767498:G/A:1   | <a href="#">rs237902</a>   | chr3       | 8767498  | <a href="#">CAV3</a> | protein_coding | non-coding intronic       |
| chr3:8767498:G/A:1   | <a href="#">rs237902</a>   | chr3       | 8767498  | <a href="#">OXTR</a> | protein_coding | coding syn,3downstream    |
| chr3:8767536:C/T:1   | <a href="#">rs4686302</a>  | chr3       | 8767536  | <a href="#">CAV3</a> | protein_coding | non-coding intronic       |
| chr3:8767536:C/T:1   | <a href="#">rs4686302</a>  | chr3       | 8767536  | <a href="#">OXTR</a> | protein_coding | coding nonsyn,3downstream |

| SNP                        | Variant | Strand | Gene | Transcript   | Entrez gene | Predicted Function | CDNA Position | CDS Position | AA Position | AA Change | Detail | Splice Distance |
|----------------------------|---------|--------|------|--------------|-------------|--------------------|---------------|--------------|-------------|-----------|--------|-----------------|
| <a href="#">rs1042778</a>  | G/Y     | 1      | OXTR | NM_000916    | 5021        | 3utr               | 1910          |              |             |           |        |                 |
| <a href="#">rs1042778</a>  | G/Y     | 1      | OXTR | NM_001354653 | 5021        | 3utr               | 1830          |              |             |           |        |                 |
| <a href="#">rs1042778</a>  | G/Y     | 1      | OXTR | NM_001354654 | 5021        | 3utr               | 1887          |              |             |           |        |                 |
| <a href="#">rs1042778</a>  | G/Y     | 1      | OXTR | NM_001354655 | 5021        | 3utr               | 1711          |              |             |           |        |                 |
| <a href="#">rs1042778</a>  | G/Y     | 1      | OXTR | NM_001354656 | 5021        | 3utr               | 1565          |              |             |           |        |                 |
| <a href="#">rs11706648</a> | A/C     | 1      | OXTR | NM_000916    | 5021        | intronic           |               |              |             |           |        | 1637            |
| <a href="#">rs11706648</a> | A/C     | 1      | OXTR | NM_001354653 | 5021        | intronic           |               |              |             |           |        | 1637            |
| <a href="#">rs11706648</a> | A/C     | 1      | OXTR | NM_001354654 | 5021        | intronic           |               |              |             |           |        | 1637            |
| <a href="#">rs11706648</a> | A/C     | 1      | OXTR | NM_001354655 | 5021        | intronic           |               |              |             |           |        | 1637            |
| <a href="#">rs11706648</a> | A/C     | 1      | OXTR | NM_001354656 | 5021        | intronic           |               |              |             |           |        | 1637            |
| <a href="#">rs237888</a>   | T/C     | 1      | OXTR | NM_000916    | 5021        | intronic           |               |              |             |           |        | 2185            |
| <a href="#">rs237888</a>   | T/C     | 1      | OXTR | NM_001354653 | 5021        | intronic           |               |              |             |           |        | 2185            |
| <a href="#">rs237888</a>   | T/C     | 1      | OXTR | NM_001354654 | 5021        | intronic           |               |              |             |           |        | 2185            |
| <a href="#">rs237888</a>   | T/C     | 1      | OXTR | NM_001354655 | 5021        | intronic           |               |              |             |           |        | 2185            |
| <a href="#">rs237888</a>   | T/C     | 1      | OXTR | NM_001354656 | 5021        | intronic           |               |              |             |           |        | 2185            |
| <a href="#">rs237895</a>   | T/C     | 1      | OXTR | NM_000916    | 5021        | intronic           |               |              |             |           |        | 1529            |
| <a href="#">rs237895</a>   | T/C     | 1      | OXTR | NM_001354653 | 5021        | intronic           |               |              |             |           |        | 1529            |
| <a href="#">rs237895</a>   | T/C     | 1      | OXTR | NM_001354654 | 5021        | intronic           |               |              |             |           |        | 1529            |
| <a href="#">rs237895</a>   | T/C     | 1      | OXTR | NM_001354655 | 5021        | intronic           |               |              |             |           |        | 1529            |
| <a href="#">rs237895</a>   | T/C     | 1      | OXTR | NM_001354656 | 5021        | intronic           |               |              |             |           |        | 1529            |
| <a href="#">rs237902</a>   | G/A     | 1      | OXTR | NM_000916    | 5021        | coding             | 1312          | 690          | 230         | N>N       | syn    |                 |
| <a href="#">rs237902</a>   | G/A     | 1      | OXTR | NM_001354653 | 5021        | coding             | 1232          | 690          | 230         | N>N       | syn    |                 |
| <a href="#">rs237902</a>   | G/A     | 1      | OXTR | NM_001354654 | 5021        | coding             | 1289          | 690          | 230         | N>N       | syn    |                 |
| <a href="#">rs237902</a>   | G/A     | 1      | OXTR | NM_001354655 | 5021        | coding             | 1113          | 690          | 230         | N>N       | syn    |                 |
| <a href="#">rs237902</a>   | G/A     | 1      | OXTR | NM_001354656 | 5021        | coding             | 967           | 690          | 230         | N>N       | syn    |                 |
| <a href="#">rs4686301</a>  | C/T     | 1      | OXTR | NM_000916    | 5021        | intronic           |               |              |             |           |        | 3676            |
| <a href="#">rs4686301</a>  | C/T     | 1      | OXTR | NM_001354653 | 5021        | intronic           |               |              |             |           |        | 3676            |
| <a href="#">rs4686301</a>  | C/T     | 1      | OXTR | NM_001354654 | 5021        | intronic           |               |              |             |           |        | 3676            |
| <a href="#">rs4686301</a>  | C/T     | 1      | OXTR | NM_001354655 | 5021        | intronic           |               |              |             |           |        | 3676            |
| <a href="#">rs4686301</a>  | C/T     | 1      | OXTR | NM_001354656 | 5021        | intronic           |               |              |             |           |        | 3676            |
| <a href="#">rs4686302</a>  | C/T     | 1      | OXTR | NM_000916    | 5021        | coding             | 1274          | 652          | 218         | A>T       | nonsyn |                 |
| <a href="#">rs4686302</a>  | C/T     | 1      | OXTR | NM_001354653 | 5021        | coding             | 1194          | 652          | 218         | A>T       | nonsyn |                 |
| <a href="#">rs4686302</a>  | C/T     | 1      | OXTR | NM_001354654 | 5021        | coding             | 1251          | 652          | 218         | A>T       | nonsyn |                 |
| <a href="#">rs4686302</a>  | C/T     | 1      | OXTR | NM_001354655 | 5021        | coding             | 1075          | 652          | 218         | A>T       | nonsyn |                 |
| <a href="#">rs4686302</a>  | C/T     | 1      | OXTR | NM_001354656 | 5021        | coding             | 929           | 652          | 218         | A>T       | nonsyn |                 |
| <a href="#">rs53576</a>    | A/G     | 1      | OXTR | NM_000916    | 5021        | intronic           |               |              |             |           |        | 4581            |
| <a href="#">rs53576</a>    | A/G     | 1      | OXTR | NM_001354653 | 5021        | intronic           |               |              |             |           |        | 4581            |
| <a href="#">rs53576</a>    | A/G     | 1      | OXTR | NM_001354654 | 5021        | intronic           |               |              |             |           |        | 4581            |
| <a href="#">rs53576</a>    | A/G     | 1      | OXTR | NM_001354655 | 5021        | intronic           |               |              |             |           |        | 4581            |
| <a href="#">rs53576</a>    | A/G     | 1      | OXTR | NM_001354656 | 5021        | intronic           |               |              |             |           |        | 4581            |

| SNP                        | Variant | Strand | Symbol | Gene                       | Predicted Function  | CDNA Position | CDS Position | AA Position | AA Change | Detail | Splice Distance |
|----------------------------|---------|--------|--------|----------------------------|---------------------|---------------|--------------|-------------|-----------|--------|-----------------|
| <a href="#">rs1042778</a>  | G/Y     | 1      | OXTR   | <a href="#">uc003brc.4</a> | 3utr                | 1913          |              |             |           |        |                 |
| <a href="#">rs1042778</a>  | G/Y     | 1      | CAV3   | <a href="#">uc062ghm.1</a> | non-coding intronic |               |              |             |           |        | 18869           |
| <a href="#">rs11706648</a> | A/C     | 1      | OXTR   | <a href="#">uc003brc.4</a> | intronic            |               |              |             |           |        | 1637            |
| <a href="#">rs11706648</a> | A/C     | 1      | CAV3   | <a href="#">uc062ghm.1</a> | non-coding intronic |               |              |             |           |        | 20871           |
| <a href="#">rs237888</a>   | T/C     | 1      | OXTR   | <a href="#">uc003brc.4</a> | intronic            |               |              |             |           |        | 2185            |
| <a href="#">rs237888</a>   | T/C     | 1      | CAV3   | <a href="#">uc062ghm.1</a> | non-coding intronic |               |              |             |           |        | 21419           |
| <a href="#">rs237895</a>   | T/C     | 1      | OXTR   | <a href="#">uc003brc.4</a> | intronic            |               |              |             |           |        | 1529            |
| <a href="#">rs237895</a>   | T/C     | 1      | CAV3   | <a href="#">uc062ghm.1</a> | non-coding intronic |               |              |             |           |        | 11740           |
| <a href="#">rs237902</a>   | G/A     | 1      | OXTR   | <a href="#">uc003brc.4</a> | coding              | 1315          | 690          | 230         | N>N       | syn    |                 |
| <a href="#">rs237902</a>   | G/A     | 1      | CAV3   | <a href="#">uc062ghm.1</a> | non-coding intronic |               |              |             |           |        | 9979            |
| <a href="#">rs237902</a>   | G/A     | 1      | OXTR   | <a href="#">uc062ghn.1</a> | 3downstream         |               |              |             |           |        |                 |
| <a href="#">rs237902</a>   | G/A     | 1      | OXTR   | <a href="#">uc062gho.1</a> | 3downstream         |               |              |             |           |        |                 |
| <a href="#">rs237902</a>   | G/A     | 1      | OXTR   | <a href="#">uc062ghp.1</a> | 3downstream         |               |              |             |           |        |                 |
| <a href="#">rs4686301</a>  | C/T     | 1      | OXTR   | <a href="#">uc003brc.4</a> | intronic            |               |              |             |           |        | 3676            |
| <a href="#">rs4686301</a>  | C/T     | 1      | CAV3   | <a href="#">uc062ghm.1</a> | non-coding intronic |               |              |             |           |        | 20577           |
| <a href="#">rs4686302</a>  | C/T     | 1      | OXTR   | <a href="#">uc003brc.4</a> | coding              | 1277          | 652          | 218         | A>T       | nonsyn |                 |
| <a href="#">rs4686302</a>  | C/T     | 1      | CAV3   | <a href="#">uc062ghm.1</a> | non-coding intronic |               |              |             |           |        | 9941            |
| <a href="#">rs4686302</a>  | C/T     | 1      | OXTR   | <a href="#">uc062ghn.1</a> | 3downstream         |               |              |             |           |        |                 |
| <a href="#">rs4686302</a>  | C/T     | 1      | OXTR   | <a href="#">uc062gho.1</a> | 3downstream         |               |              |             |           |        |                 |
| <a href="#">rs4686302</a>  | C/T     | 1      | OXTR   | <a href="#">uc062ghp.1</a> | 3downstream         |               |              |             |           |        |                 |
| <a href="#">rs53576</a>    | A/G     | 1      | OXTR   | <a href="#">uc003brc.4</a> | intronic            |               |              |             |           |        | 4581            |
| <a href="#">rs53576</a>    | A/G     | 1      | CAV3   | <a href="#">uc062ghm.1</a> | non-coding intronic |               |              |             |           |        | 14792           |

| SNP        | Variant | Strand | Symbol | Gene            | Transcript      | Predicted Function  | CDNA Position | CDS Position | AA Position | AA Change | Detail | Splice Distance |
|------------|---------|--------|--------|-----------------|-----------------|---------------------|---------------|--------------|-------------|-----------|--------|-----------------|
| rs1042778  | G Y     | 1      | OXTR   | ENSG00000180914 | ENST00000316793 | 3utr                | 1913          |              |             |           |        | 18869           |
| rs1042778  | G Y     | 1      | CAV3   | ENSG00000182533 | ENST00000472766 | non-coding intronic |               |              |             |           |        | 18869           |
| rs11706648 | A C     | 1      | OXTR   | ENSG00000180914 | ENST00000316793 | intronic            |               |              |             |           |        | 1637            |
| rs11706648 | A C     | 1      | CAV3   | ENSG00000182533 | ENST00000472766 | non-coding intronic |               |              |             |           |        | 20871           |
| rs237888   | T C     | 1      | OXTR   | ENSG00000180914 | ENST00000316793 | intronic            |               |              |             |           |        | 2185            |
| rs237888   | T C     | 1      | CAV3   | ENSG00000182533 | ENST00000472766 | non-coding intronic |               |              |             |           |        | 21419           |
| rs237895   | T C     | 1      | OXTR   | ENSG00000180914 | ENST00000316793 | intronic            |               |              |             |           |        | 1529            |
| rs237895   | T C     | 1      | CAV3   | ENSG00000182533 | ENST00000472766 | non-coding intronic |               |              |             |           |        | 11740           |
| rs237902   | G A     | 1      | OXTR   | ENSG00000180914 | ENST00000316793 | coding              | 1315          | 690          | 230         | N>N       | syn    |                 |
| rs237902   | G A     | 1      | OXTR   | ENSG00000180914 | ENST00000431493 | 3downstream         |               |              |             |           |        |                 |
| rs237902   | G A     | 1      | OXTR   | ENSG00000180914 | ENST00000449615 | 3downstream         |               |              |             |           |        |                 |
| rs237902   | G A     | 1      | CAV3   | ENSG00000182533 | ENST00000472766 | non-coding intronic |               |              |             |           |        | 9979            |
| rs237902   | G A     | 1      | OXTR   | ENSG00000180914 | ENST00000474615 | 3downstream         |               |              |             |           |        |                 |
| rs4686301  | C T     | 1      | OXTR   | ENSG00000180914 | ENST00000316793 | intronic            |               |              |             |           |        | 3676            |
| rs4686301  | C T     | 1      | CAV3   | ENSG00000182533 | ENST00000472766 | non-coding intronic |               |              |             |           |        | 20577           |
| rs4686302  | C T     | 1      | OXTR   | ENSG00000180914 | ENST00000316793 | coding              | 1277          | 652          | 218         | A>T       | nonsyn |                 |
| rs4686302  | C T     | 1      | OXTR   | ENSG00000180914 | ENST00000431493 | 3downstream         |               |              |             |           |        |                 |
| rs4686302  | C T     | 1      | OXTR   | ENSG00000180914 | ENST00000449615 | 3downstream         |               |              |             |           |        |                 |
| rs4686302  | C T     | 1      | CAV3   | ENSG00000182533 | ENST00000472766 | non-coding intronic |               |              |             |           |        | 9941            |
| rs4686302  | C T     | 1      | OXTR   | ENSG00000180914 | ENST00000474615 | 3downstream         |               |              |             |           |        |                 |
| rs53576    | A G     | 1      | OXTR   | ENSG00000180914 | ENST00000316793 | intronic            |               |              |             |           |        | 4581            |
| rs53576    | A G     | 1      | CAV3   | ENSG00000182533 | ENST00000472766 | non-coding intronic |               |              |             |           |        | 14792           |

| SNP       | Variant | Transcript                      | Protein                         | AA Position | wild_AA | mutant_AA | Score | Prediction |
|-----------|---------|---------------------------------|---------------------------------|-------------|---------|-----------|-------|------------|
| rs4686302 | C/T     | <a href="#">ENST00000316793</a> | <a href="#">ENSP00000324270</a> | 218         | A       | T         | 0.4   | tolerated  |

| SNP       | Variant | Transcript                      | Protein                         | AA Position | wild_AA | mutant_AA | Score | Prediction |
|-----------|---------|---------------------------------|---------------------------------|-------------|---------|-----------|-------|------------|
| rs4686302 | C/T     | <a href="#">ENST00000316793</a> | <a href="#">ENSP00000324270</a> | 218         | A       | T         | 0.01  | benign     |

| <b>SNP</b>                 | <b>Chrom</b> | <b>Position</b> | <b>REF Allele</b> | <b>ALT Allele</b> | <b>Frequency</b> |
|----------------------------|--------------|-----------------|-------------------|-------------------|------------------|
| <a href="#">rs1042778</a>  | 3            | 8752859         | G                 | T                 | 0.3767           |
| <a href="#">rs11706648</a> | 3            | 8754861         | A                 | C                 | 0.3201           |
| <a href="#">rs237888</a>   | 3            | 8755409         | T                 | C                 | 0.0596           |
| <a href="#">rs4686301</a>  | 3            | 8756900         | C                 | T                 | 0.3082           |
| <a href="#">rs53576</a>    | 3            | 8762685         | A                 | G                 | 0.6491           |
| <a href="#">rs237895</a>   | 3            | 8765737         | T                 | C                 | 0.5895           |
| <a href="#">rs237902</a>   | 3            | 8767498         | G                 | A                 | 0.327            |
| <a href="#">rs4686302</a>  | 3            | 8767536         | C                 | T                 | 0.1183           |



| <b>SNP</b>                | <b>Chromosome</b> | <b>chromStart</b> | <b>chromEnd</b> | <b>CpG_Island</b> | <b>Length</b> | <b>CpG %</b> | <b>C/G %</b> | <b>Ratio</b> |
|---------------------------|-------------------|-------------------|-----------------|-------------------|---------------|--------------|--------------|--------------|
| <a href="#">rs237902</a>  | chr3              | 8767275           | 8769594         | CpG: 184          | 2319          | 15.9         | 63.6         | 0.79         |
| <a href="#">rs4686302</a> | chr3              | 8767275           | 8769594         | CpG: 184          | 2319          | 15.9         | 63.6         | 0.79         |

| SNP                        | Chromosome | Region Start | Region End | Feature Type Class   | Feature Type | Epigenome       |
|----------------------------|------------|--------------|------------|----------------------|--------------|-----------------|
| <a href="#">rs1042778</a>  | chr3       | 8750440      | 8753120    | Histone              | H3K36me3     | HSMM            |
| <a href="#">rs1042778</a>  | chr3       | 8751420      | 8757980    | Histone              | H3K79me2     | HSMM            |
| <a href="#">rs1042778</a>  | chr3       | 8752000      | 8754800    | Histone              | H3K36me3     | HSMMtube        |
| <a href="#">rs1042778</a>  | chr3       | 8752140      | 8753300    | Histone              | H3K36me3     | NH-A            |
| <a href="#">rs1042778</a>  | chr3       | 8752200      | 8753760    | Histone              | H3K36me3     | DND-41          |
| <a href="#">rs1042778</a>  | chr3       | 8752320      | 8753840    | Histone              | H3K79me2     | HSMMtube        |
| <a href="#">rs1042778</a>  | chr3       | 8752360      | 8754180    | Histone              | H3K36me3     | GM12878         |
| <a href="#">rs1042778</a>  | chr3       | 8752700      | 8753300    | Histone              | H4K20me1     | NH-A            |
| <a href="#">rs1042778</a>  | chr3       | 8752780      | 8753180    | Histone              | H3K36me3     | A549            |
| <a href="#">rs11706648</a> | chr3       | 8751420      | 8757980    | Histone              | H3K79me2     | HSMM            |
| <a href="#">rs11706648</a> | chr3       | 8753200      | 8754900    | Histone              | H3K36me3     | HSMM            |
| <a href="#">rs11706648</a> | chr3       | 8754300      | 8754880    | Histone              | H3K4me1      | HSMMtube        |
| <a href="#">rs11706648</a> | chr3       | 8754520      | 8754880    | Histone              | H4K20me1     | NH-A            |
| <a href="#">rs11706648</a> | chr3       | 8754560      | 8756540    | Histone              | H3K4me1      | HepG2           |
| <a href="#">rs237888</a>   | chr3       | 8751420      | 8757980    | Histone              | H3K79me2     | HSMM            |
| <a href="#">rs237888</a>   | chr3       | 8754560      | 8756540    | Histone              | H3K4me1      | HepG2           |
| <a href="#">rs237888</a>   | chr3       | 8754920      | 8757260    | Histone              | H3K36me3     | HSMM            |
| <a href="#">rs237888</a>   | chr3       | 8755029      | 8755472    | Transcription Factor | FOXA1        | HepG2           |
| <a href="#">rs237888</a>   | chr3       | 8755080      | 8755500    | Histone              | H3K79me2     | HSMMtube        |
| <a href="#">rs237888</a>   | chr3       | 8755200      | 8755560    | Histone              | H3K36me3     | Osteobl         |
| <a href="#">rs237888</a>   | chr3       | 8755220      | 8755440    | Histone              | H3K4me1      | A549            |
| <a href="#">rs237888</a>   | chr3       | 8755240      | 8755780    | Histone              | H4K20me1     | Osteobl         |
| <a href="#">rs237888</a>   | chr3       | 8755359      | 8756021    | Transcription Factor | CTCF         | HSMM            |
| <a href="#">rs237888</a>   | chr3       | 8755389      | 8755988    | Transcription Factor | CTCF         | Osteobl         |
| <a href="#">rs4686301</a>  | chr3       | 8751420      | 8757980    | Histone              | H3K79me2     | HSMM            |
| <a href="#">rs4686301</a>  | chr3       | 8754920      | 8757260    | Histone              | H3K36me3     | HSMM            |
| <a href="#">rs4686301</a>  | chr3       | 8755860      | 8757240    | Histone              | H3K79me2     | HSMMtube        |
| <a href="#">rs4686301</a>  | chr3       | 8755940      | 8757260    | Histone              | H3K4me1      | HSMMtube        |
| <a href="#">rs4686301</a>  | chr3       | 8756420      | 8758280    | Histone              | H3K4me1      | HSMM            |
| <a href="#">rs4686301</a>  | chr3       | 8756460      | 8757260    | Histone              | H3K4me1      | NHDF-AD         |
| <a href="#">rs4686301</a>  | chr3       | 8756520      | 8757000    | Histone              | H3K4me1      | NH-A            |
| <a href="#">rs4686301</a>  | chr3       | 8756569      | 8757033    | Open Chromatin       | DNase1       | HSMMtube        |
| <a href="#">rs4686301</a>  | chr3       | 8756577      | 8757043    | Open Chromatin       | DNase1       | NHDF-AD         |
| <a href="#">rs4686301</a>  | chr3       | 8756840      | 8757140    | Histone              | H3K4me1      | HMEC            |
| <a href="#">rs53576</a>    | chr3       | 8759780      | 8769580    | Histone              | H3K79me2     | HSMM            |
| <a href="#">rs53576</a>    | chr3       | 8762360      | 8762800    | Histone              | H3K36me3     | HSMM            |
| <a href="#">rs53576</a>    | chr3       | 8762400      | 8763640    | Histone              | H3K4me1      | Osteobl         |
| <a href="#">rs53576</a>    | chr3       | 8762400      | 8763880    | Histone              | H3K79me2     | HSMMtube        |
| <a href="#">rs53576</a>    | chr3       | 8762460      | 8762860    | Histone              | H4K20me1     | Osteobl         |
| <a href="#">rs53576</a>    | chr3       | 8762460      | 8762740    | Histone              | H3K27me3     | HepG2           |
| <a href="#">rs53576</a>    | chr3       | 8762480      | 8763380    | Histone              | H3K4me1      | HepG2           |
| <a href="#">rs53576</a>    | chr3       | 8762540      | 8764980    | Histone              | H3K4me1      | HSMM            |
| <a href="#">rs53576</a>    | chr3       | 8762540      | 8763420    | Histone              | H4K20me1     | NH-A            |
| <a href="#">rs53576</a>    | chr3       | 8762620      | 8763760    | Histone              | H3K4me1      | HSMMtube        |
| <a href="#">rs237895</a>   | chr3       | 8759780      | 8769580    | Histone              | H3K79me2     | HSMM            |
| <a href="#">rs237895</a>   | chr3       | 8763840      | 8766100    | Histone              | H3K36me3     | HSMM            |
| <a href="#">rs237895</a>   | chr3       | 8763940      | 8769500    | Histone              | H3K4me1      | NH-A            |
| <a href="#">rs237895</a>   | chr3       | 8763960      | 8770080    | Histone              | H3K79me2     | HSMMtube        |
| <a href="#">rs237895</a>   | chr3       | 8764760      | 8766820    | Histone              | H3K4me1      | HepG2           |
| <a href="#">rs237895</a>   | chr3       | 8764903      | 8770258    | Histone              | H3K4me2      | NH-A            |
| <a href="#">rs237895</a>   | chr3       | 8765000      | 8768000    | Histone              | H3K4me1      | HSMM            |
| <a href="#">rs237895</a>   | chr3       | 8765000      | 8769500    | Histone              | H3K79me2     | GM12878         |
| <a href="#">rs237895</a>   | chr3       | 8765040      | 8771940    | Histone              | H3K27me3     | Monocytes-CD14+ |
| <a href="#">rs237895</a>   | chr3       | 8765180      | 8766160    | Histone              | H4K20me1     | NH-A            |
| <a href="#">rs237895</a>   | chr3       | 8765239      | 8769523    | Histone              | H3K4me2      | HSMM            |
| <a href="#">rs237895</a>   | chr3       | 8765300      | 8766160    | Histone              | H3K27me3     | HUVEC           |
| <a href="#">rs237895</a>   | chr3       | 8765440      | 8765820    | Histone              | H3K4me1      | Osteobl         |
| <a href="#">rs237895</a>   | chr3       | 8765540      | 8765800    | Histone              | H3K36me3     | GM12878         |
| <a href="#">rs237895</a>   | chr3       | 8765540      | 8765780    | Histone              | H3K27me3     | HepG2           |
| <a href="#">rs237895</a>   | chr3       | 8765625      | 8770033    | Histone              | H3K4me3      | HSMM            |

|                          |      |         |         |                      |          |                 |
|--------------------------|------|---------|---------|----------------------|----------|-----------------|
| <a href="#">rs237895</a> | chr3 | 8765660 | 8766040 | Histone              | H4K20me1 | Osteobl         |
| <a href="#">rs237902</a> | chr3 | 8759780 | 8769580 | Histone              | H3K79me2 | HSMM            |
| <a href="#">rs237902</a> | chr3 | 8763940 | 8769500 | Histone              | H3K4me1  | NH-A            |
| <a href="#">rs237902</a> | chr3 | 8763960 | 8770080 | Histone              | H3K79me2 | HSMMtube        |
| <a href="#">rs237902</a> | chr3 | 8764903 | 8770258 | Histone              | H3K4me2  | NH-A            |
| <a href="#">rs237902</a> | chr3 | 8765000 | 8768000 | Histone              | H3K4me1  | HSMM            |
| <a href="#">rs237902</a> | chr3 | 8765000 | 8769500 | Histone              | H3K79me2 | GM12878         |
| <a href="#">rs237902</a> | chr3 | 8765040 | 8771940 | Histone              | H3K27me3 | Monocytes-CD14+ |
| <a href="#">rs237902</a> | chr3 | 8765239 | 8769523 | Histone              | H3K4me2  | HSMM            |
| <a href="#">rs237902</a> | chr3 | 8765625 | 8770033 | Histone              | H3K4me3  | HSMM            |
| <a href="#">rs237902</a> | chr3 | 8765980 | 8768140 | Histone              | H3K4me1  | NHLF            |
| <a href="#">rs237902</a> | chr3 | 8765983 | 8770171 | Histone              | H3K4me3  | Osteobl         |
| <a href="#">rs237902</a> | chr3 | 8766100 | 8769740 | Histone              | H3K27me3 | NHEK            |
| <a href="#">rs237902</a> | chr3 | 8766180 | 8769500 | Histone              | H3K27me3 | HUVEC           |
| <a href="#">rs237902</a> | chr3 | 8766200 | 8767680 | Histone              | H4K20me1 | NH-A            |
| <a href="#">rs237902</a> | chr3 | 8766240 | 8768120 | Histone              | H3K36me3 | NHLF            |
| <a href="#">rs237902</a> | chr3 | 8766264 | 8769562 | Histone              | H3K4me3  | NH-A            |
| <a href="#">rs237902</a> | chr3 | 8766273 | 8769530 | Histone              | H3K9ac   | NH-A            |
| <a href="#">rs237902</a> | chr3 | 8766306 | 8769956 | Histone              | H3K4me3  | GM12878         |
| <a href="#">rs237902</a> | chr3 | 8766340 | 8767540 | Histone              | H3K36me3 | HSMM            |
| <a href="#">rs237902</a> | chr3 | 8766580 | 8768120 | Histone              | H3K27me3 | Osteobl         |
| <a href="#">rs237902</a> | chr3 | 8766759 | 8770010 | Histone              | H3K4me2  | GM12878         |
| <a href="#">rs237902</a> | chr3 | 8766780 | 8770040 | Histone              | H3K4me1  | GM12878         |
| <a href="#">rs237902</a> | chr3 | 8767140 | 8768140 | Histone              | H3K4me1  | NHDF-AD         |
| <a href="#">rs237902</a> | chr3 | 8767214 | 8769840 | Open Chromatin       | DNase1   | H1ESC           |
| <a href="#">rs237902</a> | chr3 | 8767220 | 8767540 | Histone              | H3K4me1  | K562            |
| <a href="#">rs237902</a> | chr3 | 8767226 | 8770004 | Histone              | H3K4me2  | NHDF-AD         |
| <a href="#">rs237902</a> | chr3 | 8767260 | 8770120 | Histone              | H3K4me1  | HMEC            |
| <a href="#">rs237902</a> | chr3 | 8767275 | 8769966 | Histone              | H2AZ     | GM12878         |
| <a href="#">rs237902</a> | chr3 | 8767292 | 8768330 | Transcription Factor | ZEB1     | GM12878         |
| <a href="#">rs237902</a> | chr3 | 8767340 | 8768300 | Histone              | H3K36me3 | DND-41          |
| <a href="#">rs237902</a> | chr3 | 8767380 | 8768180 | Histone              | H3K4me1  | Osteobl         |
| <a href="#">rs237902</a> | chr3 | 8767414 | 8768687 | Histone              | H3K4me2  | HMEC            |
| <a href="#">rs237902</a> | chr3 | 8767449 | 8769855 | Histone              | H3K4me2  | NHEK            |
| <a href="#">rs237902</a> | chr3 | 8767462 | 8770076 | Histone              | H3K4me2  | H1ESC           |
| <a href="#">rs237902</a> | chr3 | 8767492 | 8768280 | Transcription Factor | CTCF     | NHEK            |

| SNP                        | Chromosome | Region Start | Region End | Feature Type Class | Feature Type | Epigenome                    |
|----------------------------|------------|--------------|------------|--------------------|--------------|------------------------------|
| <a href="#">rs1042778</a>  | chr3       | 8752320      | 8753140    | Histone            | H3K36me3     | Fetal Muscle Leg             |
| <a href="#">rs1042778</a>  | chr3       | 8752320      | 8753140    | Histone            | H3K36me3     | Fetal Muscle Leg             |
| <a href="#">rs1042778</a>  | chr3       | 8752320      | 8754200    | Histone            | H3K36me3     | H1-mesenchymal               |
| <a href="#">rs1042778</a>  | chr3       | 8752320      | 8754200    | Histone            | H3K36me3     | H1-mesenchymal               |
| <a href="#">rs1042778</a>  | chr3       | 8752340      | 8755000    | Histone            | H3K4me1      | Fetal Muscle Leg             |
| <a href="#">rs1042778</a>  | chr3       | 8752340      | 8755000    | Histone            | H3K4me1      | Fetal Muscle Leg             |
| <a href="#">rs1042778</a>  | chr3       | 8752500      | 8753380    | Histone            | H3K36me3     | Fetal Stomach                |
| <a href="#">rs1042778</a>  | chr3       | 8752500      | 8753380    | Histone            | H3K36me3     | Fetal Stomach                |
| <a href="#">rs1042778</a>  | chr3       | 8752680      | 8753560    | Histone            | H3K36me3     | H1-trophoblast               |
| <a href="#">rs1042778</a>  | chr3       | 8752680      | 8753560    | Histone            | H3K36me3     | H1-trophoblast               |
| <a href="#">rs1042778</a>  | chr3       | 8752720      | 8754160    | Histone            | H3K27me3     | Fetal Adrenal Gland          |
| <a href="#">rs1042778</a>  | chr3       | 8752720      | 8754160    | Histone            | H3K27me3     | Fetal Adrenal Gland          |
| <a href="#">rs1042778</a>  | chr3       | 8752720      | 8752980    | Histone            | H3K9me3      | Lung                         |
| <a href="#">rs1042778</a>  | chr3       | 8752720      | 8752980    | Histone            | H3K9me3      | Lung                         |
| <a href="#">rs1042778</a>  | chr3       | 8752760      | 8753200    | Histone            | H3K36me3     | Lung                         |
| <a href="#">rs1042778</a>  | chr3       | 8752760      | 8753200    | Histone            | H3K36me3     | Lung                         |
| <a href="#">rs1042778</a>  | chr3       | 8752800      | 8753680    | Histone            | H3K4me1      | iPS DF 19.11                 |
| <a href="#">rs1042778</a>  | chr3       | 8752800      | 8753680    | Histone            | H3K4me1      | iPS DF 19.11                 |
| <a href="#">rs1042778</a>  | chr3       | 8752800      | 8753640    | Histone            | H3K4me1      | H1-mesenchymal               |
| <a href="#">rs1042778</a>  | chr3       | 8752800      | 8753640    | Histone            | H3K4me1      | H1-mesenchymal               |
| <a href="#">rs11706648</a> | chr3       | 8752340      | 8755000    | Histone            | H3K4me1      | Fetal Muscle Leg             |
| <a href="#">rs11706648</a> | chr3       | 8752340      | 8755000    | Histone            | H3K4me1      | Fetal Muscle Leg             |
| <a href="#">rs237888</a>   | chr3       | 8755160      | 8755440    | Histone            | H3K27me3     | iPS-20b                      |
| <a href="#">rs237888</a>   | chr3       | 8755380      | 8762640    | Histone            | H3K4me1      | Fetal Muscle Leg             |
| <a href="#">rs237888</a>   | chr3       | 8755380      | 8762640    | Histone            | H3K4me1      | Fetal Muscle Leg             |
| <a href="#">rs4686301</a>  | chr3       | 8755380      | 8762640    | Histone            | H3K4me1      | Fetal Muscle Leg             |
| <a href="#">rs4686301</a>  | chr3       | 8755380      | 8762640    | Histone            | H3K4me1      | Fetal Muscle Leg             |
| <a href="#">rs4686301</a>  | chr3       | 8756300      | 8757220    | Histone            | H3K27me3     | Fetal Adrenal Gland          |
| <a href="#">rs4686301</a>  | chr3       | 8756300      | 8757220    | Histone            | H3K27me3     | Fetal Adrenal Gland          |
| <a href="#">rs4686301</a>  | chr3       | 8756380      | 8761680    | Histone            | H3K4me1      | Fetal Muscle Trunk           |
| <a href="#">rs4686301</a>  | chr3       | 8756380      | 8761680    | Histone            | H3K4me1      | Fetal Muscle Trunk           |
| <a href="#">rs4686301</a>  | chr3       | 8756440      | 8757220    | Histone            | H3K36me3     | H1-mesenchymal               |
| <a href="#">rs4686301</a>  | chr3       | 8756440      | 8757220    | Histone            | H3K36me3     | H1-mesenchymal               |
| <a href="#">rs4686301</a>  | chr3       | 8756460      | 8757180    | Histone            | H3K4me1      | H1-mesenchymal               |
| <a href="#">rs4686301</a>  | chr3       | 8756460      | 8757180    | Histone            | H3K4me1      | H1-mesenchymal               |
| <a href="#">rs4686301</a>  | chr3       | 8756540      | 8757180    | Histone            | H3K4me1      | iPS DF 19.11                 |
| <a href="#">rs4686301</a>  | chr3       | 8756540      | 8757180    | Histone            | H3K4me1      | iPS DF 19.11                 |
| <a href="#">rs4686301</a>  | chr3       | 8756557      | 8759183    | Histone            | H3K27ac      | Fetal Muscle Trunk           |
| <a href="#">rs4686301</a>  | chr3       | 8756557      | 8759183    | Histone            | H3K27ac      | Fetal Muscle Trunk           |
| <a href="#">rs53576</a>    | chr3       | 8759460      | 8763860    | Histone            | H3K27me3     | Fetal Adrenal Gland          |
| <a href="#">rs53576</a>    | chr3       | 8759460      | 8763860    | Histone            | H3K27me3     | Fetal Adrenal Gland          |
| <a href="#">rs53576</a>    | chr3       | 8759560      | 8763840    | Histone            | H3K36me3     | H1-mesenchymal               |
| <a href="#">rs53576</a>    | chr3       | 8759560      | 8763840    | Histone            | H3K36me3     | H1-mesenchymal               |
| <a href="#">rs53576</a>    | chr3       | 8762380      | 8771680    | Histone            | H3K27me3     | Fetal Stomach                |
| <a href="#">rs53576</a>    | chr3       | 8762380      | 8771680    | Histone            | H3K27me3     | Fetal Stomach                |
| <a href="#">rs53576</a>    | chr3       | 8762440      | 8763760    | Histone            | H3K4me1      | H1-mesenchymal               |
| <a href="#">rs53576</a>    | chr3       | 8762440      | 8763760    | Histone            | H3K4me1      | H1-mesenchymal               |
| <a href="#">rs53576</a>    | chr3       | 8762480      | 8763880    | Histone            | H3K27me3     | Placenta                     |
| <a href="#">rs53576</a>    | chr3       | 8762480      | 8763880    | Histone            | H3K27me3     | Placenta                     |
| <a href="#">rs53576</a>    | chr3       | 8762620      | 8763440    | Histone            | H3K4me1      | iPS DF 19.11                 |
| <a href="#">rs53576</a>    | chr3       | 8762620      | 8763440    | Histone            | H3K4me1      | iPS DF 19.11                 |
| <a href="#">rs237895</a>   | chr3       | 8762380      | 8771680    | Histone            | H3K27me3     | Fetal Stomach                |
| <a href="#">rs237895</a>   | chr3       | 8762380      | 8771680    | Histone            | H3K27me3     | Fetal Stomach                |
| <a href="#">rs237895</a>   | chr3       | 8763720      | 8771160    | Histone            | H3K27me3     | Fetal Thymus                 |
| <a href="#">rs237895</a>   | chr3       | 8763720      | 8771160    | Histone            | H3K27me3     | Fetal Thymus                 |
| <a href="#">rs237895</a>   | chr3       | 8763900      | 8770900    | Histone            | H3K27me3     | iPS-20b                      |
| <a href="#">rs237895</a>   | chr3       | 8763980      | 8766120    | Histone            | H3K36me3     | H1-mesenchymal               |
| <a href="#">rs237895</a>   | chr3       | 8763980      | 8766120    | Histone            | H3K36me3     | H1-mesenchymal               |
| <a href="#">rs237895</a>   | chr3       | 8764020      | 8766900    | Histone            | H3K4me1      | Fetal Muscle Trunk           |
| <a href="#">rs237895</a>   | chr3       | 8764020      | 8766900    | Histone            | H3K4me1      | Fetal Muscle Trunk           |
| <a href="#">rs237895</a>   | chr3       | 8764820      | 8770060    | Histone            | H3K4me1      | Fetal Muscle Leg             |
| <a href="#">rs237895</a>   | chr3       | 8764820      | 8770060    | Histone            | H3K4me1      | Fetal Muscle Leg             |
| <a href="#">rs237895</a>   | chr3       | 8764980      | 8765940    | Histone            | H3K27me3     | Monocytes-CD14+ (PB) Roadmap |
| <a href="#">rs237895</a>   | chr3       | 8764980      | 8765940    | Histone            | H3K27me3     | Monocytes-CD14+ (PB) Roadmap |
| <a href="#">rs237895</a>   | chr3       | 8765380      | 8766060    | Histone            | H3K27me3     | Fetal Intestine Large        |
| <a href="#">rs237895</a>   | chr3       | 8765380      | 8766060    | Histone            | H3K27me3     | Fetal Intestine Large        |
| <a href="#">rs237895</a>   | chr3       | 8765500      | 8765980    | Histone            | H3K4me1      | H1-mesenchymal               |
| <a href="#">rs237895</a>   | chr3       | 8765500      | 8765980    | Histone            | H3K4me1      | H1-mesenchymal               |

|                          |      |         |         |         |          |                              |
|--------------------------|------|---------|---------|---------|----------|------------------------------|
| <a href="#">rs237895</a> | chr3 | 8765580 | 8766900 | Histone | H3K27me3 | Placenta                     |
| <a href="#">rs237895</a> | chr3 | 8765580 | 8766900 | Histone | H3K27me3 | Placenta                     |
| <a href="#">rs237895</a> | chr3 | 8765600 | 8771200 | Histone | H3K27me3 | Fetal Muscle Trunk           |
| <a href="#">rs237895</a> | chr3 | 8765600 | 8771200 | Histone | H3K27me3 | Fetal Muscle Trunk           |
| <a href="#">rs237902</a> | chr3 | 8762380 | 8771680 | Histone | H3K27me3 | Fetal Stomach                |
| <a href="#">rs237902</a> | chr3 | 8762380 | 8771680 | Histone | H3K27me3 | Fetal Stomach                |
| <a href="#">rs237902</a> | chr3 | 8763720 | 8771160 | Histone | H3K27me3 | Fetal Thymus                 |
| <a href="#">rs237902</a> | chr3 | 8763720 | 8771160 | Histone | H3K27me3 | Fetal Thymus                 |
| <a href="#">rs237902</a> | chr3 | 8763900 | 8770900 | Histone | H3K27me3 | iPS-20b                      |
| <a href="#">rs237902</a> | chr3 | 8764820 | 8770060 | Histone | H3K4me1  | Fetal Muscle Leg             |
| <a href="#">rs237902</a> | chr3 | 8764820 | 8770060 | Histone | H3K4me1  | Fetal Muscle Leg             |
| <a href="#">rs237902</a> | chr3 | 8765600 | 8771200 | Histone | H3K27me3 | Fetal Muscle Trunk           |
| <a href="#">rs237902</a> | chr3 | 8765600 | 8771200 | Histone | H3K27me3 | Fetal Muscle Trunk           |
| <a href="#">rs237902</a> | chr3 | 8765980 | 8771600 | Histone | H3K27me3 | Monocytes-CD14+ (PB) Roadmap |
| <a href="#">rs237902</a> | chr3 | 8765980 | 8771600 | Histone | H3K27me3 | Monocytes-CD14+ (PB) Roadmap |
| <a href="#">rs237902</a> | chr3 | 8766020 | 8768600 | Histone | H3K4me1  | H1-mesenchymal               |
| <a href="#">rs237902</a> | chr3 | 8766020 | 8768600 | Histone | H3K4me1  | H1-mesenchymal               |
| <a href="#">rs237902</a> | chr3 | 8766040 | 8769820 | Histone | H3K27me3 | Fetal Adrenal Gland          |
| <a href="#">rs237902</a> | chr3 | 8766040 | 8769820 | Histone | H3K27me3 | Fetal Adrenal Gland          |
| <a href="#">rs237902</a> | chr3 | 8766080 | 8771020 | Histone | H3K27me3 | Fetal Intestine Large        |
| <a href="#">rs237902</a> | chr3 | 8766080 | 8771020 | Histone | H3K27me3 | Fetal Intestine Large        |
| <a href="#">rs237902</a> | chr3 | 8766100 | 8771120 | Histone | H3K27me3 | Fetal Muscle Leg             |
| <a href="#">rs237902</a> | chr3 | 8766100 | 8771120 | Histone | H3K27me3 | Fetal Muscle Leg             |
| <a href="#">rs237902</a> | chr3 | 8766140 | 8771100 | Histone | H3K27me3 | Fetal Intestine Small        |
| <a href="#">rs237902</a> | chr3 | 8766140 | 8771100 | Histone | H3K27me3 | Fetal Intestine Small        |
| <a href="#">rs237902</a> | chr3 | 8766160 | 8768340 | Histone | H3K36me3 | H1-mesenchymal               |
| <a href="#">rs237902</a> | chr3 | 8766160 | 8768340 | Histone | H3K36me3 | H1-mesenchymal               |
| <a href="#">rs237902</a> | chr3 | 8766240 | 8769460 | Histone | H2AK5ac  | IMR90                        |
| <a href="#">rs237902</a> | chr3 | 8766500 | 8769820 | Histone | H3K27me3 | H1ESC                        |
| <a href="#">rs237902</a> | chr3 | 8766500 | 8769540 | Histone | H3K27me3 | H1ESC                        |
| <a href="#">rs237902</a> | chr3 | 8766880 | 8769700 | Histone | H3K4me1  | iPS DF 19.11                 |
| <a href="#">rs237902</a> | chr3 | 8766880 | 8769700 | Histone | H3K4me1  | iPS DF 19.11                 |
| <a href="#">rs237902</a> | chr3 | 8766980 | 8767600 | Histone | H3K27me3 | Placenta                     |
| <a href="#">rs237902</a> | chr3 | 8766980 | 8767600 | Histone | H3K27me3 | Placenta                     |
| <a href="#">rs237902</a> | chr3 | 8767020 | 8769780 | Histone | H3K4me1  | Fetal Muscle Trunk           |
| <a href="#">rs237902</a> | chr3 | 8767020 | 8769780 | Histone | H3K4me1  | Fetal Muscle Trunk           |
| <a href="#">rs237902</a> | chr3 | 8767020 | 8771100 | Histone | H3K27me3 | T cells (PB) Roadmap         |
| <a href="#">rs237902</a> | chr3 | 8767020 | 8771100 | Histone | H3K27me3 | T cells (PB) Roadmap         |
| <a href="#">rs237902</a> | chr3 | 8767100 | 8768680 | Histone | H3K4me1  | IMR90                        |
| <a href="#">rs237902</a> | chr3 | 8767100 | 8769780 | Histone | H3K4me1  | Lung                         |
| <a href="#">rs237902</a> | chr3 | 8767100 | 8769780 | Histone | H3K4me1  | Lung                         |
| <a href="#">rs237902</a> | chr3 | 8767160 | 8768580 | Histone | H3K4me1  | Pancreas                     |
| <a href="#">rs237902</a> | chr3 | 8767160 | 8768580 | Histone | H3K4me1  | Pancreas                     |
| <a href="#">rs237902</a> | chr3 | 8767200 | 8768360 | Histone | H3K4me1  | Gastric                      |
| <a href="#">rs237902</a> | chr3 | 8767200 | 8768360 | Histone | H3K4me1  | Gastric                      |
| <a href="#">rs237902</a> | chr3 | 8767220 | 8767980 | Histone | H3K36me3 | H1-trophoblast               |
| <a href="#">rs237902</a> | chr3 | 8767220 | 8767980 | Histone | H3K36me3 | H1-trophoblast               |
| <a href="#">rs237902</a> | chr3 | 8767240 | 8767920 | Histone | H3K9me3  | iPS DF 19.11                 |
| <a href="#">rs237902</a> | chr3 | 8767240 | 8767920 | Histone | H3K9me3  | iPS DF 19.11                 |
| <a href="#">rs237902</a> | chr3 | 8767260 | 8769520 | Histone | H3K4me1  | H1-trophoblast               |
| <a href="#">rs237902</a> | chr3 | 8767260 | 8769520 | Histone | H3K4me1  | H1-trophoblast               |
| <a href="#">rs237902</a> | chr3 | 8767280 | 8769820 | Histone | H3K4me1  | Spleen                       |
| <a href="#">rs237902</a> | chr3 | 8767280 | 8769820 | Histone | H3K4me1  | Spleen                       |
| <a href="#">rs237902</a> | chr3 | 8767300 | 8767980 | Histone | H3K9me3  | Lung                         |
| <a href="#">rs237902</a> | chr3 | 8767300 | 8767980 | Histone | H3K9me3  | Lung                         |
| <a href="#">rs237902</a> | chr3 | 8767340 | 8767980 | Histone | H3K4me1  | Psoas Muscle                 |
| <a href="#">rs237902</a> | chr3 | 8767380 | 8768020 | Histone | H3K27me3 | H1-trophoblast               |
| <a href="#">rs237902</a> | chr3 | 8767380 | 8768020 | Histone | H3K27me3 | H1-trophoblast               |
| <a href="#">rs237902</a> | chr3 | 8767400 | 8767920 | Histone | H3K4me1  | iPS DF 6.9                   |
| <a href="#">rs237902</a> | chr3 | 8767400 | 8767920 | Histone | H3K4me1  | iPS DF 6.9                   |
| <a href="#">rs237902</a> | chr3 | 8767400 | 8767560 | Histone | H3K27me3 | H1-neuronal progenitor       |
| <a href="#">rs237902</a> | chr3 | 8767400 | 8767560 | Histone | H3K27me3 | H1-neuronal progenitor       |
| <a href="#">rs237902</a> | chr3 | 8767420 | 8767920 | Histone | H3K4me1  | Left Ventricle               |
| <a href="#">rs237902</a> | chr3 | 8767420 | 8767920 | Histone | H3K4me1  | Left Ventricle               |
| <a href="#">rs237902</a> | chr3 | 8767436 | 8769990 | Histone | H3K4me2  | IMR90                        |
| <a href="#">rs237902</a> | chr3 | 8767440 | 8767720 | Histone | H3K14ac  | IMR90                        |
| <a href="#">rs237902</a> | chr3 | 8767473 | 8769957 | Histone | H3K4me3  | IMR90                        |

| SNP                      | Chromosome | Region Start | Region End | Feature Type Class | Epigenome                    | Activity |
|--------------------------|------------|--------------|------------|--------------------|------------------------------|----------|
| <a href="#">rs237888</a> | chr3       | 8755401      | 8756000    | CTCF Binding Site  | A549                         | ACTIVE   |
| <a href="#">rs237888</a> | chr3       | 8755401      | 8756000    | CTCF Binding Site  | Aorta                        | INACTIVE |
| <a href="#">rs237888</a> | chr3       | 8755401      | 8756000    | CTCF Binding Site  | Aorta                        | INACTIVE |
| <a href="#">rs237888</a> | chr3       | 8755401      | 8756000    | CTCF Binding Site  | B cells (PB) Roadmap         | INACTIVE |
| <a href="#">rs237888</a> | chr3       | 8755401      | 8756000    | CTCF Binding Site  | B cells (PB) Roadmap         | INACTIVE |
| <a href="#">rs237888</a> | chr3       | 8755401      | 8756000    | CTCF Binding Site  | CD14+CD16- monocyte (CB)     | INACTIVE |
| <a href="#">rs237888</a> | chr3       | 8755401      | 8756000    | CTCF Binding Site  | CD14+CD16- monocyte (VB)     | INACTIVE |
| <a href="#">rs237888</a> | chr3       | 8755401      | 8756000    | CTCF Binding Site  | CD4+ ab T cell (VB)          | INACTIVE |
| <a href="#">rs237888</a> | chr3       | 8755401      | 8756000    | CTCF Binding Site  | CD8+ ab T cell (CB)          | INACTIVE |
| <a href="#">rs237888</a> | chr3       | 8755401      | 8756000    | CTCF Binding Site  | CM CD4+ ab T cell (VB)       | INACTIVE |
| <a href="#">rs237888</a> | chr3       | 8755401      | 8756000    | CTCF Binding Site  | DND-41                       | ACTIVE   |
| <a href="#">rs237888</a> | chr3       | 8755401      | 8756000    | CTCF Binding Site  | eosinophil (VB)              | INACTIVE |
| <a href="#">rs237888</a> | chr3       | 8755401      | 8756000    | CTCF Binding Site  | EPC (VB)                     | INACTIVE |
| <a href="#">rs237888</a> | chr3       | 8755401      | 8756000    | CTCF Binding Site  | erythroblast (CB)            | INACTIVE |
| <a href="#">rs237888</a> | chr3       | 8755401      | 8756000    | CTCF Binding Site  | Fetal Adrenal Gland          | INACTIVE |
| <a href="#">rs237888</a> | chr3       | 8755401      | 8756000    | CTCF Binding Site  | Fetal Adrenal Gland          | INACTIVE |
| <a href="#">rs237888</a> | chr3       | 8755401      | 8756000    | CTCF Binding Site  | Fetal Intestine Large        | INACTIVE |
| <a href="#">rs237888</a> | chr3       | 8755401      | 8756000    | CTCF Binding Site  | Fetal Intestine Large        | INACTIVE |
| <a href="#">rs237888</a> | chr3       | 8755401      | 8756000    | CTCF Binding Site  | Fetal Intestine Small        | INACTIVE |
| <a href="#">rs237888</a> | chr3       | 8755401      | 8756000    | CTCF Binding Site  | Fetal Intestine Small        | INACTIVE |
| <a href="#">rs237888</a> | chr3       | 8755401      | 8756000    | CTCF Binding Site  | Fetal Intestine Small        | INACTIVE |
| <a href="#">rs237888</a> | chr3       | 8755401      | 8756000    | CTCF Binding Site  | Fetal Muscle Leg             | INACTIVE |
| <a href="#">rs237888</a> | chr3       | 8755401      | 8756000    | CTCF Binding Site  | Fetal Muscle Leg             | INACTIVE |
| <a href="#">rs237888</a> | chr3       | 8755401      | 8756000    | CTCF Binding Site  | Fetal Muscle Trunk           | INACTIVE |
| <a href="#">rs237888</a> | chr3       | 8755401      | 8756000    | CTCF Binding Site  | Fetal Muscle Trunk           | INACTIVE |
| <a href="#">rs237888</a> | chr3       | 8755401      | 8756000    | CTCF Binding Site  | Fetal Stomach                | INACTIVE |
| <a href="#">rs237888</a> | chr3       | 8755401      | 8756000    | CTCF Binding Site  | Fetal Stomach                | INACTIVE |
| <a href="#">rs237888</a> | chr3       | 8755401      | 8756000    | CTCF Binding Site  | Fetal Thymus                 | INACTIVE |
| <a href="#">rs237888</a> | chr3       | 8755401      | 8756000    | CTCF Binding Site  | Fetal Thymus                 | INACTIVE |
| <a href="#">rs237888</a> | chr3       | 8755401      | 8756000    | CTCF Binding Site  | Gastric                      | INACTIVE |
| <a href="#">rs237888</a> | chr3       | 8755401      | 8756000    | CTCF Binding Site  | Gastric                      | INACTIVE |
| <a href="#">rs237888</a> | chr3       | 8755401      | 8756000    | CTCF Binding Site  | GM12878                      | ACTIVE   |
| <a href="#">rs237888</a> | chr3       | 8755401      | 8756000    | CTCF Binding Site  | H1-mesenchymal               | INACTIVE |
| <a href="#">rs237888</a> | chr3       | 8755401      | 8756000    | CTCF Binding Site  | H1-mesenchymal               | INACTIVE |
| <a href="#">rs237888</a> | chr3       | 8755401      | 8756000    | CTCF Binding Site  | H1-neuronal progenitor       | INACTIVE |
| <a href="#">rs237888</a> | chr3       | 8755401      | 8756000    | CTCF Binding Site  | H1-neuronal progenitor       | INACTIVE |
| <a href="#">rs237888</a> | chr3       | 8755401      | 8756000    | CTCF Binding Site  | H1-trophoblast               | INACTIVE |
| <a href="#">rs237888</a> | chr3       | 8755401      | 8756000    | CTCF Binding Site  | H1-trophoblast               | INACTIVE |
| <a href="#">rs237888</a> | chr3       | 8755401      | 8756000    | CTCF Binding Site  | H1ESC                        | ACTIVE   |
| <a href="#">rs237888</a> | chr3       | 8755401      | 8756000    | CTCF Binding Site  | H9                           | INACTIVE |
| <a href="#">rs237888</a> | chr3       | 8755401      | 8756000    | CTCF Binding Site  | H9                           | INACTIVE |
| <a href="#">rs237888</a> | chr3       | 8755401      | 8756000    | CTCF Binding Site  | HeLa-S3                      | ACTIVE   |
| <a href="#">rs237888</a> | chr3       | 8755401      | 8756000    | CTCF Binding Site  | HepG2                        | INACTIVE |
| <a href="#">rs237888</a> | chr3       | 8755401      | 8756000    | CTCF Binding Site  | HMEC                         | ACTIVE   |
| <a href="#">rs237888</a> | chr3       | 8755401      | 8756000    | CTCF Binding Site  | HSMM                         | INACTIVE |
| <a href="#">rs237888</a> | chr3       | 8755401      | 8756000    | CTCF Binding Site  | HSMMtube                     | ACTIVE   |
| <a href="#">rs237888</a> | chr3       | 8755401      | 8756000    | CTCF Binding Site  | HUVEC                        | ACTIVE   |
| <a href="#">rs237888</a> | chr3       | 8755401      | 8756000    | CTCF Binding Site  | HUVEC prol (CB)              | INACTIVE |
| <a href="#">rs237888</a> | chr3       | 8755401      | 8756000    | CTCF Binding Site  | IMR90                        | ACTIVE   |
| <a href="#">rs237888</a> | chr3       | 8755401      | 8756000    | CTCF Binding Site  | iPS-20b                      | INACTIVE |
| <a href="#">rs237888</a> | chr3       | 8755401      | 8756000    | CTCF Binding Site  | iPS DF 19.11                 | INACTIVE |
| <a href="#">rs237888</a> | chr3       | 8755401      | 8756000    | CTCF Binding Site  | iPS DF 19.11                 | INACTIVE |
| <a href="#">rs237888</a> | chr3       | 8755401      | 8756000    | CTCF Binding Site  | iPS DF 6.9                   | INACTIVE |
| <a href="#">rs237888</a> | chr3       | 8755401      | 8756000    | CTCF Binding Site  | iPS DF 6.9                   | INACTIVE |
| <a href="#">rs237888</a> | chr3       | 8755401      | 8756000    | CTCF Binding Site  | K562                         | ACTIVE   |
| <a href="#">rs237888</a> | chr3       | 8755401      | 8756000    | CTCF Binding Site  | Left Ventricle               | INACTIVE |
| <a href="#">rs237888</a> | chr3       | 8755401      | 8756000    | CTCF Binding Site  | Left Ventricle               | INACTIVE |
| <a href="#">rs237888</a> | chr3       | 8755401      | 8756000    | CTCF Binding Site  | Lung                         | INACTIVE |
| <a href="#">rs237888</a> | chr3       | 8755401      | 8756000    | CTCF Binding Site  | Lung                         | INACTIVE |
| <a href="#">rs237888</a> | chr3       | 8755401      | 8756000    | CTCF Binding Site  | M0 macrophage (CB)           | INACTIVE |
| <a href="#">rs237888</a> | chr3       | 8755401      | 8756000    | CTCF Binding Site  | M0 macrophage (VB)           | INACTIVE |
| <a href="#">rs237888</a> | chr3       | 8755401      | 8756000    | CTCF Binding Site  | M1 macrophage (CB)           | INACTIVE |
| <a href="#">rs237888</a> | chr3       | 8755401      | 8756000    | CTCF Binding Site  | M1 macrophage (VB)           | INACTIVE |
| <a href="#">rs237888</a> | chr3       | 8755401      | 8756000    | CTCF Binding Site  | M2 macrophage (CB)           | INACTIVE |
| <a href="#">rs237888</a> | chr3       | 8755401      | 8756000    | CTCF Binding Site  | M2 macrophage (VB)           | INACTIVE |
| <a href="#">rs237888</a> | chr3       | 8755401      | 8756000    | CTCF Binding Site  | Monocytes-CD14+              | INACTIVE |
| <a href="#">rs237888</a> | chr3       | 8755401      | 8756000    | CTCF Binding Site  | Monocytes-CD14+ (PB) Roadmap | INACTIVE |
| <a href="#">rs237888</a> | chr3       | 8755401      | 8756000    | CTCF Binding Site  | Monocytes-CD14+ (PB) Roadmap | INACTIVE |
| <a href="#">rs237888</a> | chr3       | 8755401      | 8756000    | CTCF Binding Site  | MSC (VB)                     | INACTIVE |

|                           |      |         |         |                   |                           |           |
|---------------------------|------|---------|---------|-------------------|---------------------------|-----------|
| <a href="#">rs237888</a>  | chr3 | 8755401 | 8756000 | CTCF Binding Site | naive B cell (VB)         | INACTIVE  |
| <a href="#">rs237888</a>  | chr3 | 8755401 | 8756000 | CTCF Binding Site | Natural Killer cells (PB) | INACTIVE  |
| <a href="#">rs237888</a>  | chr3 | 8755401 | 8756000 | CTCF Binding Site | Natural Killer cells (PB) | INACTIVE  |
| <a href="#">rs237888</a>  | chr3 | 8755401 | 8756000 | CTCF Binding Site | neutrophil (CB)           | INACTIVE  |
| <a href="#">rs237888</a>  | chr3 | 8755401 | 8756000 | CTCF Binding Site | neutrophil myelocyte (BM) | INACTIVE  |
| <a href="#">rs237888</a>  | chr3 | 8755401 | 8756000 | CTCF Binding Site | neutrophil (VB)           | INACTIVE  |
| <a href="#">rs237888</a>  | chr3 | 8755401 | 8756000 | CTCF Binding Site | NH-A                      | REPRESSED |
| <a href="#">rs237888</a>  | chr3 | 8755401 | 8756000 | CTCF Binding Site | NHDF-AD                   | INACTIVE  |
| <a href="#">rs237888</a>  | chr3 | 8755401 | 8756000 | CTCF Binding Site | NHEK                      | ACTIVE    |
| <a href="#">rs237888</a>  | chr3 | 8755401 | 8756000 | CTCF Binding Site | NHLF                      | ACTIVE    |
| <a href="#">rs237888</a>  | chr3 | 8755401 | 8756000 | CTCF Binding Site | Osteobl                   | REPRESSED |
| <a href="#">rs237888</a>  | chr3 | 8755401 | 8756000 | CTCF Binding Site | Ovary                     | INACTIVE  |
| <a href="#">rs237888</a>  | chr3 | 8755401 | 8756000 | CTCF Binding Site | Ovary                     | INACTIVE  |
| <a href="#">rs237888</a>  | chr3 | 8755401 | 8756000 | CTCF Binding Site | Pancreas                  | INACTIVE  |
| <a href="#">rs237888</a>  | chr3 | 8755401 | 8756000 | CTCF Binding Site | Pancreas                  | INACTIVE  |
| <a href="#">rs237888</a>  | chr3 | 8755401 | 8756000 | CTCF Binding Site | Placenta                  | INACTIVE  |
| <a href="#">rs237888</a>  | chr3 | 8755401 | 8756000 | CTCF Binding Site | Placenta                  | INACTIVE  |
| <a href="#">rs237888</a>  | chr3 | 8755401 | 8756000 | CTCF Binding Site | Psoas Muscle              | INACTIVE  |
| <a href="#">rs237888</a>  | chr3 | 8755401 | 8756000 | CTCF Binding Site | Right Atrium              | INACTIVE  |
| <a href="#">rs237888</a>  | chr3 | 8755401 | 8756000 | CTCF Binding Site | Right Atrium              | INACTIVE  |
| <a href="#">rs237888</a>  | chr3 | 8755401 | 8756000 | CTCF Binding Site | Small Intestine           | INACTIVE  |
| <a href="#">rs237888</a>  | chr3 | 8755401 | 8756000 | CTCF Binding Site | Small Intestine           | INACTIVE  |
| <a href="#">rs237888</a>  | chr3 | 8755401 | 8756000 | CTCF Binding Site | Spleen                    | INACTIVE  |
| <a href="#">rs237888</a>  | chr3 | 8755401 | 8756000 | CTCF Binding Site | Spleen                    | INACTIVE  |
| <a href="#">rs237888</a>  | chr3 | 8755401 | 8756000 | CTCF Binding Site | T cells (PB) Roadmap      | INACTIVE  |
| <a href="#">rs237888</a>  | chr3 | 8755401 | 8756000 | CTCF Binding Site | T cells (PB) Roadmap      | INACTIVE  |
| <a href="#">rs237888</a>  | chr3 | 8755401 | 8756000 | CTCF Binding Site | Thymus                    | INACTIVE  |
| <a href="#">rs237888</a>  | chr3 | 8755401 | 8756000 | CTCF Binding Site | Thymus                    | INACTIVE  |
| <a href="#">rs4686301</a> | chr3 | 8756569 | 8757043 | Open chromatin    | A549                      | INACTIVE  |
| <a href="#">rs4686301</a> | chr3 | 8756569 | 8757043 | Open chromatin    | Aorta                     | NA        |
| <a href="#">rs4686301</a> | chr3 | 8756569 | 8757043 | Open chromatin    | Aorta                     | NA        |
| <a href="#">rs4686301</a> | chr3 | 8756569 | 8757043 | Open chromatin    | B cells (PB) Roadmap      | NA        |
| <a href="#">rs4686301</a> | chr3 | 8756569 | 8757043 | Open chromatin    | B cells (PB) Roadmap      | NA        |
| <a href="#">rs4686301</a> | chr3 | 8756569 | 8757043 | Open chromatin    | CD14+CD16- monocyte (CB)  | NA        |
| <a href="#">rs4686301</a> | chr3 | 8756569 | 8757043 | Open chromatin    | CD14+CD16- monocyte (VB)  | NA        |
| <a href="#">rs4686301</a> | chr3 | 8756569 | 8757043 | Open chromatin    | CD4+ ab T cell (VB)       | NA        |
| <a href="#">rs4686301</a> | chr3 | 8756569 | 8757043 | Open chromatin    | CD8+ ab T cell (CB)       | NA        |
| <a href="#">rs4686301</a> | chr3 | 8756569 | 8757043 | Open chromatin    | CM CD4+ ab T cell (VB)    | NA        |
| <a href="#">rs4686301</a> | chr3 | 8756569 | 8757043 | Open chromatin    | DND-41                    | NA        |
| <a href="#">rs4686301</a> | chr3 | 8756569 | 8757043 | Open chromatin    | eosinophil (VB)           | NA        |
| <a href="#">rs4686301</a> | chr3 | 8756569 | 8757043 | Open chromatin    | EPC (VB)                  | NA        |
| <a href="#">rs4686301</a> | chr3 | 8756569 | 8757043 | Open chromatin    | erythroblast (CB)         | NA        |
| <a href="#">rs4686301</a> | chr3 | 8756569 | 8757043 | Open chromatin    | Fetal Adrenal Gland       | NA        |
| <a href="#">rs4686301</a> | chr3 | 8756569 | 8757043 | Open chromatin    | Fetal Adrenal Gland       | NA        |
| <a href="#">rs4686301</a> | chr3 | 8756569 | 8757043 | Open chromatin    | Fetal Intestine Large     | NA        |
| <a href="#">rs4686301</a> | chr3 | 8756569 | 8757043 | Open chromatin    | Fetal Intestine Large     | NA        |
| <a href="#">rs4686301</a> | chr3 | 8756569 | 8757043 | Open chromatin    | Fetal Intestine Small     | NA        |
| <a href="#">rs4686301</a> | chr3 | 8756569 | 8757043 | Open chromatin    | Fetal Intestine Small     | NA        |
| <a href="#">rs4686301</a> | chr3 | 8756569 | 8757043 | Open chromatin    | Fetal Muscle Leg          | NA        |
| <a href="#">rs4686301</a> | chr3 | 8756569 | 8757043 | Open chromatin    | Fetal Muscle Leg          | NA        |
| <a href="#">rs4686301</a> | chr3 | 8756569 | 8757043 | Open chromatin    | Fetal Muscle Trunk        | NA        |
| <a href="#">rs4686301</a> | chr3 | 8756569 | 8757043 | Open chromatin    | Fetal Muscle Trunk        | NA        |
| <a href="#">rs4686301</a> | chr3 | 8756569 | 8757043 | Open chromatin    | Fetal Stomach             | NA        |
| <a href="#">rs4686301</a> | chr3 | 8756569 | 8757043 | Open chromatin    | Fetal Stomach             | NA        |
| <a href="#">rs4686301</a> | chr3 | 8756569 | 8757043 | Open chromatin    | Fetal Thymus              | NA        |
| <a href="#">rs4686301</a> | chr3 | 8756569 | 8757043 | Open chromatin    | Fetal Thymus              | NA        |
| <a href="#">rs4686301</a> | chr3 | 8756569 | 8757043 | Open chromatin    | Gastric                   | NA        |
| <a href="#">rs4686301</a> | chr3 | 8756569 | 8757043 | Open chromatin    | Gastric                   | NA        |
| <a href="#">rs4686301</a> | chr3 | 8756569 | 8757043 | Open chromatin    | GM12878                   | INACTIVE  |
| <a href="#">rs4686301</a> | chr3 | 8756569 | 8757043 | Open chromatin    | H1-mesenchymal            | NA        |
| <a href="#">rs4686301</a> | chr3 | 8756569 | 8757043 | Open chromatin    | H1-mesenchymal            | NA        |
| <a href="#">rs4686301</a> | chr3 | 8756569 | 8757043 | Open chromatin    | H1-neuronal progenitor    | NA        |
| <a href="#">rs4686301</a> | chr3 | 8756569 | 8757043 | Open chromatin    | H1-neuronal progenitor    | NA        |
| <a href="#">rs4686301</a> | chr3 | 8756569 | 8757043 | Open chromatin    | H1-trophoblast            | NA        |
| <a href="#">rs4686301</a> | chr3 | 8756569 | 8757043 | Open chromatin    | H1-trophoblast            | NA        |
| <a href="#">rs4686301</a> | chr3 | 8756569 | 8757043 | Open chromatin    | H1ESC                     | INACTIVE  |
| <a href="#">rs4686301</a> | chr3 | 8756569 | 8757043 | Open chromatin    | H9                        | NA        |
| <a href="#">rs4686301</a> | chr3 | 8756569 | 8757043 | Open chromatin    | H9                        | NA        |
| <a href="#">rs4686301</a> | chr3 | 8756569 | 8757043 | Open chromatin    | HeLa-S3                   | INACTIVE  |

|                           |      |         |         |                |                              |           |
|---------------------------|------|---------|---------|----------------|------------------------------|-----------|
| <a href="#">rs4686301</a> | chr3 | 8756569 | 8757043 | Open chromatin | HepG2                        | INACTIVE  |
| <a href="#">rs4686301</a> | chr3 | 8756569 | 8757043 | Open chromatin | HMEC                         | INACTIVE  |
| <a href="#">rs4686301</a> | chr3 | 8756569 | 8757043 | Open chromatin | HSMM                         | INACTIVE  |
| <a href="#">rs4686301</a> | chr3 | 8756569 | 8757043 | Open chromatin | HSMMtube                     | ACTIVE    |
| <a href="#">rs4686301</a> | chr3 | 8756569 | 8757043 | Open chromatin | HUVEC                        | INACTIVE  |
| <a href="#">rs4686301</a> | chr3 | 8756569 | 8757043 | Open chromatin | HUVEC prol (CB)              | NA        |
| <a href="#">rs4686301</a> | chr3 | 8756569 | 8757043 | Open chromatin | IMR90                        | INACTIVE  |
| <a href="#">rs4686301</a> | chr3 | 8756569 | 8757043 | Open chromatin | iPS-20b                      | NA        |
| <a href="#">rs4686301</a> | chr3 | 8756569 | 8757043 | Open chromatin | iPS DF 19.11                 | NA        |
| <a href="#">rs4686301</a> | chr3 | 8756569 | 8757043 | Open chromatin | iPS DF 19.11                 | NA        |
| <a href="#">rs4686301</a> | chr3 | 8756569 | 8757043 | Open chromatin | iPS DF 6.9                   | NA        |
| <a href="#">rs4686301</a> | chr3 | 8756569 | 8757043 | Open chromatin | iPS DF 6.9                   | NA        |
| <a href="#">rs4686301</a> | chr3 | 8756569 | 8757043 | Open chromatin | K562                         | REPRESSED |
| <a href="#">rs4686301</a> | chr3 | 8756569 | 8757043 | Open chromatin | Left Ventricle               | NA        |
| <a href="#">rs4686301</a> | chr3 | 8756569 | 8757043 | Open chromatin | Left Ventricle               | NA        |
| <a href="#">rs4686301</a> | chr3 | 8756569 | 8757043 | Open chromatin | Lung                         | NA        |
| <a href="#">rs4686301</a> | chr3 | 8756569 | 8757043 | Open chromatin | Lung                         | NA        |
| <a href="#">rs4686301</a> | chr3 | 8756569 | 8757043 | Open chromatin | M0 macrophage (CB)           | NA        |
| <a href="#">rs4686301</a> | chr3 | 8756569 | 8757043 | Open chromatin | M0 macrophage (VB)           | NA        |
| <a href="#">rs4686301</a> | chr3 | 8756569 | 8757043 | Open chromatin | M1 macrophage (CB)           | NA        |
| <a href="#">rs4686301</a> | chr3 | 8756569 | 8757043 | Open chromatin | M1 macrophage (VB)           | NA        |
| <a href="#">rs4686301</a> | chr3 | 8756569 | 8757043 | Open chromatin | M2 macrophage (CB)           | NA        |
| <a href="#">rs4686301</a> | chr3 | 8756569 | 8757043 | Open chromatin | M2 macrophage (VB)           | NA        |
| <a href="#">rs4686301</a> | chr3 | 8756569 | 8757043 | Open chromatin | Monocytes-CD14+              | INACTIVE  |
| <a href="#">rs4686301</a> | chr3 | 8756569 | 8757043 | Open chromatin | Monocytes-CD14+ (PB) Roadmap | NA        |
| <a href="#">rs4686301</a> | chr3 | 8756569 | 8757043 | Open chromatin | Monocytes-CD14+ (PB) Roadmap | NA        |
| <a href="#">rs4686301</a> | chr3 | 8756569 | 8757043 | Open chromatin | MSC (VB)                     | NA        |
| <a href="#">rs4686301</a> | chr3 | 8756569 | 8757043 | Open chromatin | naive B cell (VB)            | NA        |
| <a href="#">rs4686301</a> | chr3 | 8756569 | 8757043 | Open chromatin | Natural Killer cells (PB)    | NA        |
| <a href="#">rs4686301</a> | chr3 | 8756569 | 8757043 | Open chromatin | Natural Killer cells (PB)    | NA        |
| <a href="#">rs4686301</a> | chr3 | 8756569 | 8757043 | Open chromatin | neutrophil (CB)              | NA        |
| <a href="#">rs4686301</a> | chr3 | 8756569 | 8757043 | Open chromatin | neutrophil myelocyte (BM)    | NA        |
| <a href="#">rs4686301</a> | chr3 | 8756569 | 8757043 | Open chromatin | neutrophil (VB)              | NA        |
| <a href="#">rs4686301</a> | chr3 | 8756569 | 8757043 | Open chromatin | NH-A                         | INACTIVE  |
| <a href="#">rs4686301</a> | chr3 | 8756569 | 8757043 | Open chromatin | NHDF-AD                      | ACTIVE    |
| <a href="#">rs4686301</a> | chr3 | 8756569 | 8757043 | Open chromatin | NHEK                         | INACTIVE  |
| <a href="#">rs4686301</a> | chr3 | 8756569 | 8757043 | Open chromatin | NHLF                         | INACTIVE  |
| <a href="#">rs4686301</a> | chr3 | 8756569 | 8757043 | Open chromatin | Osteobl                      | REPRESSED |
| <a href="#">rs4686301</a> | chr3 | 8756569 | 8757043 | Open chromatin | Ovary                        | NA        |
| <a href="#">rs4686301</a> | chr3 | 8756569 | 8757043 | Open chromatin | Ovary                        | NA        |
| <a href="#">rs4686301</a> | chr3 | 8756569 | 8757043 | Open chromatin | Pancreas                     | NA        |
| <a href="#">rs4686301</a> | chr3 | 8756569 | 8757043 | Open chromatin | Pancreas                     | NA        |
| <a href="#">rs4686301</a> | chr3 | 8756569 | 8757043 | Open chromatin | Placenta                     | NA        |
| <a href="#">rs4686301</a> | chr3 | 8756569 | 8757043 | Open chromatin | Placenta                     | NA        |
| <a href="#">rs4686301</a> | chr3 | 8756569 | 8757043 | Open chromatin | Psoas Muscle                 | NA        |
| <a href="#">rs4686301</a> | chr3 | 8756569 | 8757043 | Open chromatin | Right Atrium                 | NA        |
| <a href="#">rs4686301</a> | chr3 | 8756569 | 8757043 | Open chromatin | Right Atrium                 | NA        |
| <a href="#">rs4686301</a> | chr3 | 8756569 | 8757043 | Open chromatin | Small Intestine              | NA        |
| <a href="#">rs4686301</a> | chr3 | 8756569 | 8757043 | Open chromatin | Small Intestine              | NA        |
| <a href="#">rs4686301</a> | chr3 | 8756569 | 8757043 | Open chromatin | Spleen                       | NA        |
| <a href="#">rs4686301</a> | chr3 | 8756569 | 8757043 | Open chromatin | Spleen                       | NA        |
| <a href="#">rs4686301</a> | chr3 | 8756569 | 8757043 | Open chromatin | T cells (PB) Roadmap         | NA        |
| <a href="#">rs4686301</a> | chr3 | 8756569 | 8757043 | Open chromatin | T cells (PB) Roadmap         | NA        |
| <a href="#">rs4686301</a> | chr3 | 8756569 | 8757043 | Open chromatin | Thymus                       | NA        |
| <a href="#">rs4686301</a> | chr3 | 8756569 | 8757043 | Open chromatin | Thymus                       | NA        |
