# Supplementary material for: Influence of oxytocin receptor single nucleotide sequence variants on contractility of human myometrium: an in vitro functional study
Source: Springer Nature journal article supplement (doi:10.1186/s12881-019-0894-8), 2019-11-12
Supplement: MOESM4 [file 17378822]

**Table S4.** *OXTR*-mRNA<sup>a</sup> in the various reference and variant allele groups.

|            | <i>OXTR</i> -mRNA<br>(CNRQ) |             |               |             | p-<br>value <sup>b</sup> |
|------------|-----------------------------|-------------|---------------|-------------|--------------------------|
|            | Reference group             |             | Variant group |             |                          |
|            | n/N                         | Mean ± SD   | n/N           | Mean ± SD   |                          |
| rs1042778  | 21/60                       | 1.14 ± 0.62 | 39/60         | 1.27 ± 0.84 | 0.540                    |
| rs11706648 | 29/60                       | 1.13 ± 0.62 | 31/60         | 1.31 ± 0.88 | 0.349                    |
| rs237888   | 54/59                       | 1.24 ± 0.77 | 5/59          | 1.22 ± 0.76 | 0.962                    |
| rs4686301  | 32/60                       | 1.09 ± 0.64 | 28/60         | 1.38 ± 0.88 | 0.143                    |
| rs53576    | 25/60                       | 1.14 ± 0.67 | 35/60         | 1.28 ± 0.83 | 0.479                    |
| rs237895   | 18/60                       | 1.18 ± 0.74 | 42/60         | 1.24 ± 0.79 | 0.786                    |
| rs237902   | 26/60                       | 1.22 ± 0.68 | 34/60         | 1.23 ± 0.84 | 0.961                    |
| rs4686302  | 45/60                       | 1.22 ± 0.78 | 15/60         | 1.23 ± 0.74 | 0.943                    |

<sup>a</sup> *OXTR*-mRNA levels were normalized to *GAPDH*-mRNA, 18S rRNA and *EEF1A1*-mRNA and are expressed as CNRQ (see Methods).

<sup>b</sup> For each sequence variant, the p-value represents the statistical significance of the difference between reference and variant groups as calculated using linear regression.

n, number of samples either in the reference group or in the variant allele group of a given variant

N, number of samples for which data on a given variant are available

SD, standard deviation
